# Supplementary material for: Methemoglobinizující látky, Kyanidy, Oxid uhelnatý
Source: Royal Society of Chemistry journal article supplement (doi:10.1039/c7sm00048k), 2010-10-20

ARTICLE

Supporting Information.

S.I.1. Tabulation of fit parameters to NR in figure 5.

Table S.I.1. Fitted parameters for composition profiles shown in figure 5.

| 30 wt% (through air) |           |        |           |
|----------------------|-----------|--------|-----------|
| layer                | Thickness | SLD    | roughness |
| 1                    | 516.19    | -0.32  | 10        |
| 2                    | 150.71    | 5.72   | 24.494    |
| 3                    | 24.254    | 3.1003 | 3         |

| 40 wt% (through air) |           |        |           |
|----------------------|-----------|--------|-----------|
| layer                | Thickness | SLD    | roughness |
| 1                    | 231.63    | -0.32  | 10        |
| 2                    | 201.42    | 5.72   | 30.458    |
| 3                    | 16.656    | 3.1254 | 5         |

| 50 wt% (through air) |           |       |           |
|----------------------|-----------|-------|-----------|
| layer                | Thickness | SLD   | roughness |
| 1                    | 118.71    | -0.32 | 10        |
| 2                    | 220.81    | 5.72  | 61.068    |
| 3                    | 15.501    | 3.451 | 5         |

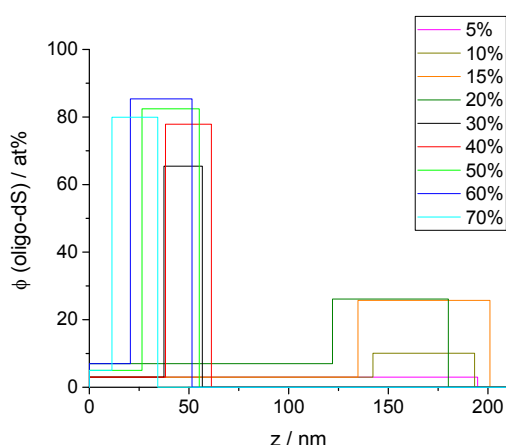

Figure S.I.2: Concentration profiles for oligo d-styrene in hPI derived from ERDA data, prior to normalisation with respect to total film thickness.

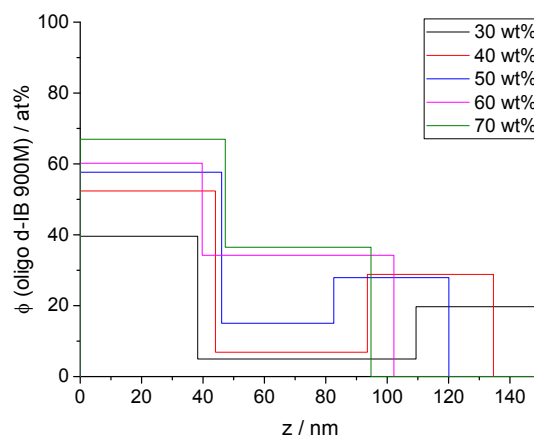

Figure S.I.3: Concentration profiles for oligo-d-IB in PB derived from ERDA data, prior to normalisation with respect to total film thickness.

S.I.4. NR results for dsq in PI and PB films.

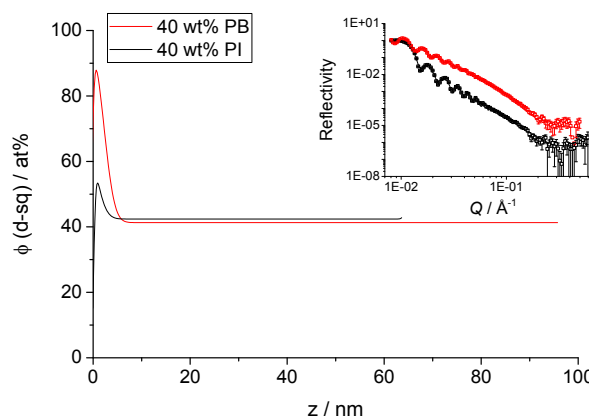

**Figure S.I.4.** NR data, fits and profiles for the d-sq in a thin PI and PB film.

40 wt% PB (through air)

| layer    | Thickness | SLD    | roughness |
|----------|-----------|--------|-----------|
| Fronting | INF       | 0      |           |
| 1        | 28.328    | 6.0405 | 5.05      |
| 2        | 984.64    | 2.6569 | 15.506    |
| 3        | 10.071    | 3.1088 | 5.0257    |
| Backing  | INF       | 2.073  | 9.9186    |

40 wt% PI (through Si)

| Layer    | Thickness | SLD    | roughness |
|----------|-----------|--------|-----------|
| Fronting | INF       | 2.073  |           |
| 1        | 10.207    | 3.1015 | 5         |
| 2        | 591.24    | 2.4716 | 5         |
| 3        | 6.1645    | 4.6088 | 34.23     |
| Backing  | INF       | 0      | 5         |

**Figure S.I.5.** Neutron reflectometry data and fit and corresponding composition profiles for 30 to 70 wt% oligo d-IB 2200 g/mol in thin PB films.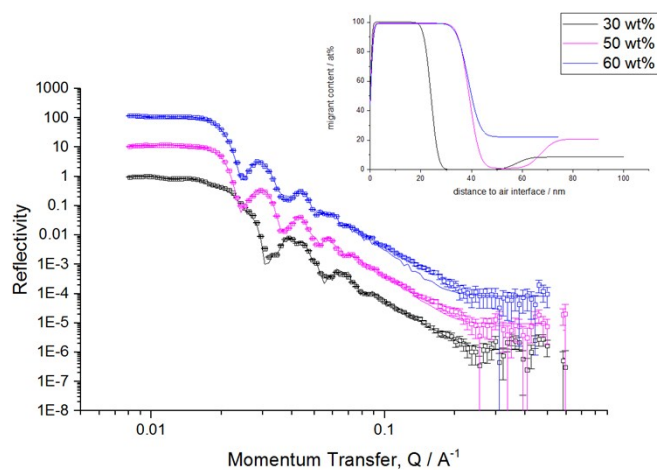

Supplement: c7sm00048k1.pdf [file c7sm00048k1.pdf]
